# Supplementary material for: Distribution and seasonal evolution of supraglacial lakes on Shackleton Ice Shelf, East Antarctica
Source: Copernicus journal article supplement (doi:10.5194/tc-2020-101), 2020-04-30
Supplement: Supplementary file 1 [file tc-2020-101-supplement.zip]

# Distribution and seasonal evolution of supraglacial lakes on Shackleton Ice Shelf, East Antarctica: Supplementary Information

Jenifer F. Arthur, Chris R. Stokes, Stewart S.R. Jamieson, J. Rachel Carr, Amber A. Leeson

5

**Table 1: Details of satellite imagery used in this study, including NDWI thresholds. Scenes used in subset area analysis are marked with a \*.**

| Scene ID                                     | Subset analysis | UTM Zone | Date       | Satellite/sensor | Cloud cover (%) | Data cover (%) | NDWI Threshold   |
|----------------------------------------------|-----------------|----------|------------|------------------|-----------------|----------------|------------------|
| S2B_MSIL1C_20200101T021549_N0208_R117_T47DNG | *               | 47S      | 01/01/2020 | Sentinel 2 MSI   | 54.4            | 45.6           | 0.25             |
| S2B_MSIL1C_20200111T021549_N0208_R117_T47DNG | *               | 47S      | 11/01/2020 | Sentinel 2 MSI   | 36              | 64             | 0.25             |
| LC08_L1GT_110107_20200113_20200127           |                 | 47S      | 13/01/2020 | Landsat 8 OLI    | 0.02            | 99.8           | 0.25             |
| LC08_L1GT_113106_20200118_20200128           |                 | 47S      | 18/01/2020 | Landsat 8 OLI    | 26.1            | 73.9           | 0.25             |
| LC08_L1GT_112107_20200127_20200210           |                 | 47S      | 27/01/2020 | Landsat 8 OLI    | 2.8             | 97.2           | 0.25             |
| S2B_MSIL1C_20200131T021549_N0208_R117_T47DNG | *               | 47S      | 31/01/2020 | Sentinel 2 MSI   | 16.3            | 83.7           | 0.25             |
| LC08_L1GT_112107_20200228_20200228           | *               | 47S      | 28/02/2020 | Landsat 8 OLI    | 0.06            | 99.9           | 0.25             |
| LC08_L1GT_111106_20191101_20191114           | *               | 47S      | 11/01/2019 | Landsat 8 OLI    | 20.2            | 79.8           | No lakes present |
| LC08_L1GT_111107_20191203_20191216           | *               | 47S      | 03/12/2019 | Landsat 8 OLI    | 0               | 100            | No lakes present |
| LC08_L1GT_111107_20191219_20191226           | *               | 47S      | 19/12/2019 | Landsat 8 OLI    | 17.4%           | 82.6%          | 0.25             |
| S2B_MSIL1C_20190105T024559_N0207_R103_T47DMG |                 | 47S      | 05/01/2019 | Sentinel 2 MSI   | 27.6%           | 72.4%          | 0.25             |
| S2B_MSIL1C_20190129T022559_N0207_R017_T47DPG |                 | 47S      | 29/01/2019 | Sentinel 2 MSI   | 20%             | 80%            | 0.25             |
| S2B_MSIL1C_20190129T022559_N0207_R017_T47DNG | *               | 47S      | 29/01/2019 | Sentinel 2 MSI   | 20%             | 80%            | 0.25             |
| LC08_L1GT_111107_20190218_20190218           | *               | 47S      | 18/02/2019 | Landsat 8 OLI    | 0%              | 100%           | 0.25             |
| S2B_MSIL1C_20190228T022549_N0207_R017_T47DNG | *               | 47S      | 28/02/2019 | Sentinel 2 MSI   | 16.8%           | 83.2%          | 0.25             |
| S2A_MSIL1C_T47DNG_A013456_20180119T022550    | *               | 47S      | 19/01/2018 | Sentinel 2 MSI   | 10.9%           | 89.1%          | 0.25             |
| S2A_MSIL1C_20180126T021551_N0206_R117_T47DNG | *               | 47S      | 26/01/2018 | Sentinel 2 MSI   | 0.2%            | 99.8%          | 0.25             |
| LC08_L1GT_113106_20180128_20180207           |                 | 47S      | 28/01/2018 | Landsat 8 OLI    | 1.9%            | 98.1%          | 0.21             |

|                                              |   |     |            |                |       |        |                  |
|----------------------------------------------|---|-----|------------|----------------|-------|--------|------------------|
| S2A_L1C_T47DNG_A013742_20180208T022548       | * | 47S | 08/02/2018 | Sentinel 2 MSI | 6.4%  | 93.6%  | 0.15             |
| LC08_L1GT_111107_20180215_20180215           | * | 47S | 15/02/2018 | Landsat 8 OLI  | 0.07% | 99.9%  | 0.20             |
| LC08_L1GT_111106_20170127_20170214           | * | 47S | 27/01/2017 | Landsat 8 OLI  | 0.3%  | 99.7%  | 0.25             |
| S2A_MSIL1C_20170130T024551_N0204_R103_T47DMG |   | 47S | 30/01/2017 | Sentinel 2 MSI | 15.5% | 84.5%  | 0.25             |
| S2A_MSIL1C_T47DNG_A008408_20170131T021548    | * | 47S | 31/01/2017 | Sentinel 2 MSI | 1.7%  | 98.3%  | 0.25             |
| S2A_MSIL1C_20170131T021551_N0204_R117_T47DPG |   | 47S | 31/01/2017 | Sentinel 2 MSI | 6.7   | 93.3   | 0.25             |
| S2A_MSIL1C_T47DPG_A008408_20170131T021548    |   | 47S | 31/01/2017 | Sentinel 2 MSI | 6.6%  | 93.4%  | 0.25             |
| LC08_L1GT_111107_20171229_20171229           | * | 47S | 29/12/2017 | Landsat 8 OLI  | 0%    | 100%   | 0.25             |
| LC08_L1GT_111107_20170228_20170228           |   | 47S | 28/02/2017 | Landsat 8 OLI  | 9.5   | 95.5   | 0.25             |
| LC08_L1GT_111107_20160109_20170405           | * | 47S | 09/01/2016 | Landsat 8 OLI  | 0.97% | 99.03% | 0.25             |
| LC08_L1GT_111107_20160125_20170330           | * | 47S | 25/01/2016 | Landsat 8 OLI  | 0.3%  | 99.7%  | 0.25             |
| LC08_L1GT_111106_20160226_20170329           | * | 47S | 26/02/2016 | Landsat 8 OLI  | 1.5%  | 98.5%  | 0.10             |
| LC08_L1GT_111107_20150106_20180204_01_T2     | * | 47S | 06/01/2015 | Landsat 8 OLI  | 5.7%  | 94.3%  | 0.25             |
| LC08_L1GT_111107_20150207_20180204           | * | 47S | 07/02/2015 | Landsat 8 OLI  | 17.9% | 82.1%  | 0.25             |
| LC08_L1GT_111107_20150223_20180204           | * | 47S | 23/02/2015 | Landsat 8 OLI  | 13.1% | 86.9%  | 0.25             |
| LC08_L1GT_111107_20140103_20170427           | * | 47S | 03/01/2014 | Landsat 8 OLI  | 27.2% | 72.8%  | 0.25             |
| LC08_L1GT_111107_20140119_20170426           | * | 47S | 19/01/2014 | Landsat 8 OLI  | 14.3% | 85.7%  | 0.25             |
| LE07_L1GT_112106_20130115_20161126           |   | 47S | 15/01/2013 | Landsat 7 ETM+ | 24%   | 76%    | 0.25             |
| LC08_L1GT_111107_20131202_20170428           | * | 47S | 02/12/2013 | Landsat 8 OLI  | 2.9%  | 97.1%  | 0.25             |
| LE07_L1GT_111106_20120122_20161203           |   | 47S | 22/01/2012 | Landsat 7 ETM+ | 15%   | 85%    | 0.25             |
| LE07_L1GT_111106_20120223_20161203           | * | 47S | 23/02/2012 | Landsat 7 ETM+ | 1%    | 99%    | 0.25             |
| LE07_L1GT_111107_20120223_20161203           | * | 47S | 23/02/2012 | Landsat 7 ETM+ | 0%    | 100%   | 0.25             |
| LE07_L1GT_111106_20110103_20161210           |   | 47S | 03/01/2011 | Landsat 7 ETM+ | 0%    | 100%   | 0.25             |
| LE07_L1GT_111107_20110204_20161211           | * | 47S | 04/02/2011 | Landsat 7 ETM+ | 0%    | 100%   | 0.25             |
| LE07_L1GT_112107_20110227_20161210           |   | 47S | 27/02/2011 | Landsat 7 ETM+ | 2%    | 98%    | 0.15             |
| LE07_L1GT_111107_20111103_20161205           | * | 47S | 03/11/2011 | Landsat 7 ETM+ | 0     | 100    | No lakes present |

|                                    |   |     |            |                |     |      |                  |
|------------------------------------|---|-----|------------|----------------|-----|------|------------------|
| LE07_L1GT_111107_20111119_20161205 | * | 47S | 19/11/2011 | Landsat 7 ETM+ | 0   | 100  | No lakes present |
| LE07_L1GT_111107_20111205_20161204 | * | 47S | 5/12/2011  | Landsat 7 ETM+ | 0   | 100  | No lakes present |
| LE07_L1GT_110107_20100210_20161217 |   | 47S | 10/02/2010 | Landsat 7 ETM+ | 0%  | 100% | 0.25             |
| LE07_L1GT_113106_20100215_20161216 | * | 47S | 15/02/2010 | Landsat 7 ETM+ | 2%  | 98%  | 0.25             |
| LE07_L1GT_113107_20100215_20161216 | * | 47S | 15/02/2010 | Landsat 7 ETM+ | 1%  | 99%  | 0.15             |
| LE07_L1GT_111107_20100217_20161215 | * | 47S | 17/02/2010 | Landsat 7 ETM+ | 0%  | 100% | 0.25             |
| LE07_L1GT_112106_20100224_20161217 | * | 47S | 24/02/2010 | Landsat 7 ETM+ | 0%  | 100% | 0.20             |
| LE07_L1GT_112106_20101107_20161212 | * | 47S | 07/11/2010 | Landsat 7 ETM+ | 0%  | 100% | 0.25             |
| LE07_L1GT_114107_20090102_20161223 |   | 47S | 02/01/2009 | Landsat 7 ETM+ | 1%  | 99%  | 0.25             |
| LE07_L1GT_111106_20091231_20161216 |   | 47S | 31/12/2009 | Landsat 7 ETM+ | 13% | 87%  | 0.20             |
| LE07_L1GT_113107_20080109_20161231 |   | 47S | 09/01/2008 | Landsat 7 ETM+ | 10% | 90%  | 0.25             |
| LE07_L1GT_111107_20080127_20161230 |   | 47S | 27/01/2008 | Landsat 7 ETM+ | 0%  | 100% | 0.25             |
| LE07_L1GT_111106_20080127_20161230 |   | 47S | 27/01/2008 | Landsat 7 ETM+ | 0%  | 100% | 0.25             |
| LE07_L1GT_111107_20081126_20161223 | * | 47S | 26/11/2008 | Landsat 7 ETM+ | 1   | 99   | No lakes present |
| LE07_L1GT_111107_20081212_20161223 | * | 47S | 12/12/2008 | Landsat 7 ETM+ | 0   | 100  | No lakes present |
| LE07_L1GT_112107_20070115_20170105 |   | 47S | 15/01/2007 | Landsat 7 ETM+ | 0%  | 100% | 0.25             |
| LE07_L1GT_113107_20070122_20170105 | * | 47S | 22/01/2007 | Landsat 7 ETM+ | 0%  | 100% | 0.25             |
| LE07_L1GT_113107_20070223_20170105 |   | 47S | 23/02/2007 | Landsat 7 ETM+ | 21% | 79%  | 0.25             |
| LE07_L1GT_112106_20061230_20170106 |   | 47S | 30/12/2006 | Landsat 7 ETM+ | 2%  | 98%  | 0.27             |
| LE07_L1GT_112106_20040208_20170123 |   | 47S | 08/02/2004 | Landsat 7 ETM+ | 19% | 81%  | 0.25             |
| LE07_L1GT_112107_20040208_20170123 |   | 47S | 08/02/2004 | Landsat 7 ETM+ | 0%  | 100% | 0.25             |
| LE07_L1GT_112106_20021219_20170127 |   | 47S | 19/12/2002 | Landsat 7 ETM+ | 0%  | 100% | 0.20             |
| LE07_L1GT_112107_20021219_20170127 |   | 47S | 19/12/2002 | Landsat 7 ETM+ | 2%  | 98%  | 0.25             |
| LE07_L1GT_111106_20000206_20170213 | * | 47S | 06/02/2000 | Landsat 7 ETM+ | 8%  | 92%  | 0.25             |
| LE07_L1GT_111107_20000206_20170213 | * | 47S | 06/02/2000 | Landsat 7 ETM+ | 0%  | 100% | 0.25             |
| LT05_L1GS_114107_19910210_20170127 |   | 47S | 10/02/1991 | Landsat 5 TM   | 0%  | 100% | 0.25             |

|                                    |  |     |            |               |     |      |      |
|------------------------------------|--|-----|------------|---------------|-----|------|------|
| LT05_L1GS_114106_19910210_20170127 |  | 47S | 10/02/1991 | Landsat 5 TM  | 0%  | 100% | 0.25 |
| LT05_L1GS_112107_19910212_20170127 |  | 47S | 12/02/1991 | Landsat 5 TM  | 1%  | 99%  | 0.25 |
| LT05_L1GS_112107_19910228_20170127 |  | 47S | 28/02/1991 | Landsat 5 TM  | 11% | 89%  | 0.25 |
| LT04_L1GS_112106_19891113_20170201 |  | 47S | 13/11/1989 | Landsat 4 TM  | 15% | 85%  | 0.25 |
| LT04_L1GS_112107_19891113_20170201 |  | 47S | 13/11/1989 | Landsat 4 TM  | 0%  | 100% | 0.25 |
| LM01_L1GS_119107_19740223_20180426 |  | 47S | 23/02/1974 | Landsat 1 MSS | 6%  | 94%  | 0.15 |

10

15

20

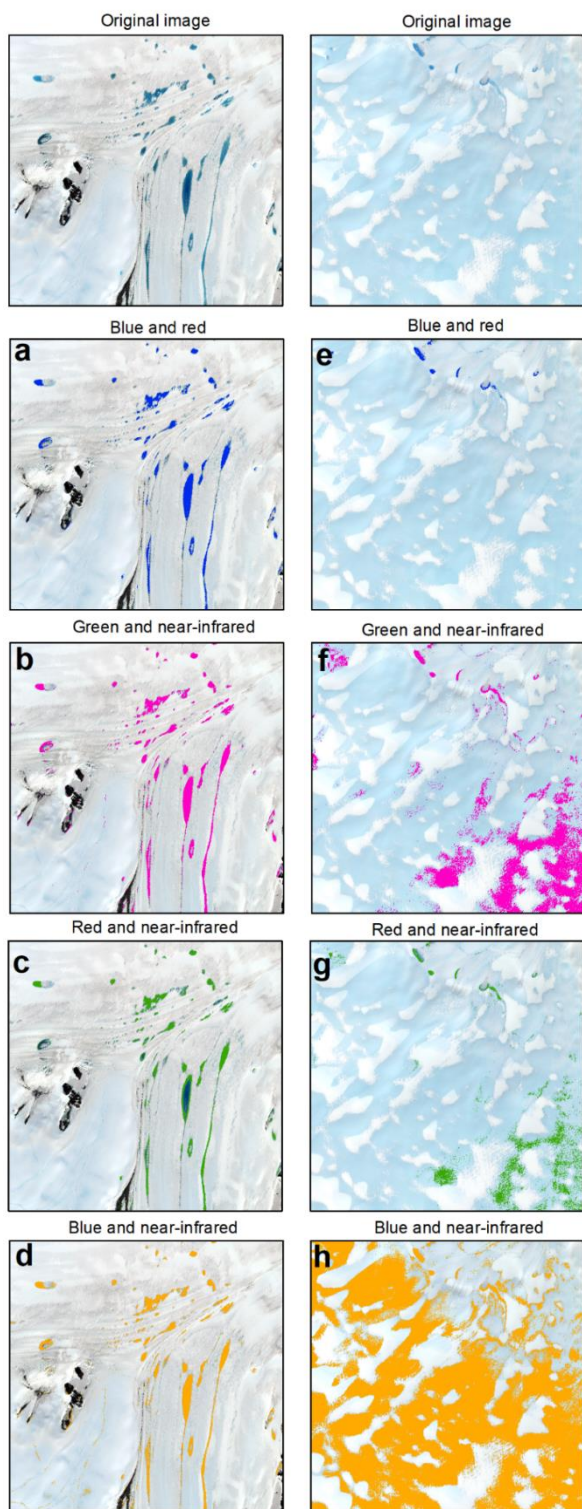

**Supplementary Figure 1. Difference between different NDWI methods over an area snow-covered ice on which supraglacial lakes have formed (a - d) and exposed blue ice (e - h). The low near-infrared spectral reflectivity of snow-free blue ice results in pixels in blue ice areas being falsely classified as being water-covered. Background image is a Sentinel 2A image captured on 26th January 2018.**

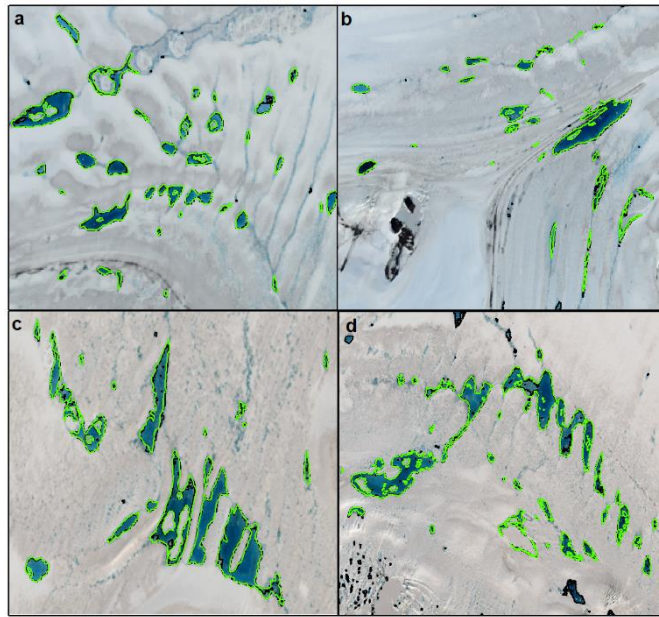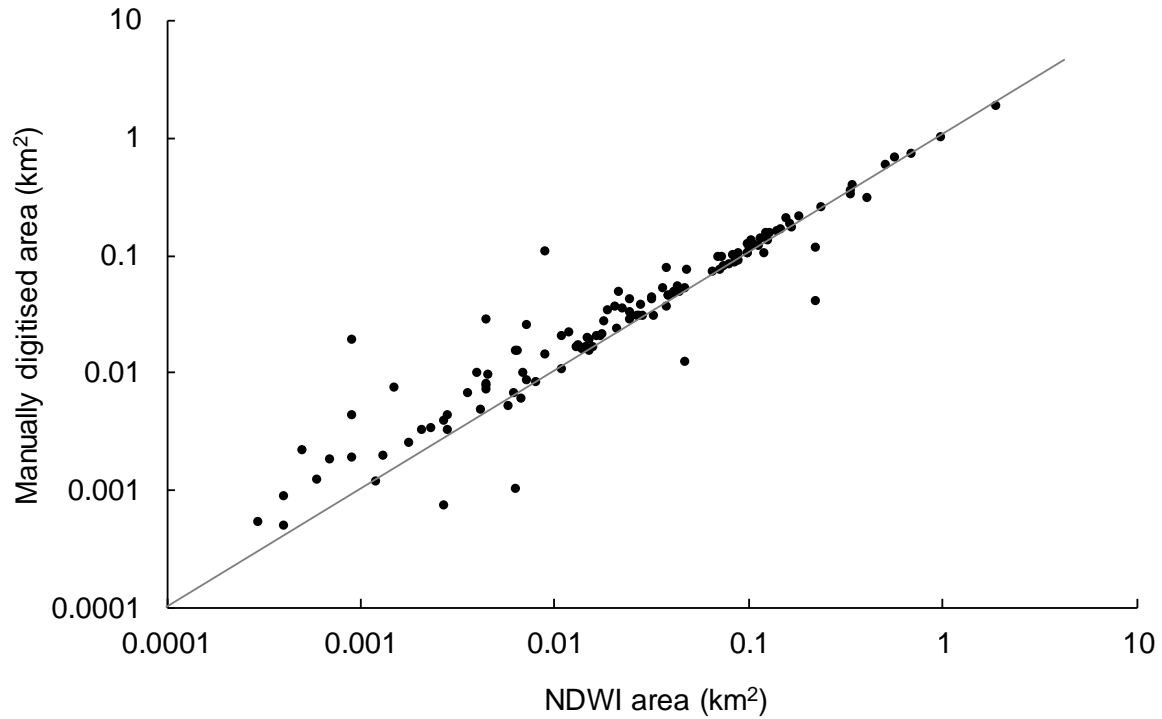

Supplementary Figure 2: Scatterplot of lake outlines comparing those derived from the Normalised Difference Water Index (black) to those derived from manual delineation (green) in four sample areas (a-d). Note the strong correlation of the linear regression ( $R^2 = 0.979$ ), but with a higher scatter at very low lake areas. Lakes were manually delineated from a Landsat 8 scene (03/01/2014) in a-b and from a Sentinel 2 scene (19/01/2018) in c-d.

Assessing the effect of sensor resolution on lake detection and areas

In order to assess the impact of sensor resolution on lake detection and lake extents, we extracted lake areas from the overlapping portion of a Sentinel 2B and Landsat 8 scene taken on 11<sup>th</sup> January 2020, using the NDWI (0.25 threshold) and a minimum size threshold of two pixels (see Section 3.2 of main paper). We detected larger numbers of smaller lakes from Sentinel 2B imagery (minimum of 200 m<sup>2</sup>) compared to Landsat 8 (minimum of 450 m<sup>2</sup>) (Supplementary Figure 3), but there is generally a very good agreement between lake areas derived from the two sensors ( $R^2 = 0.9923$ ,  $RMSE = 0.0003$ ). Lake areas derived from Sentinel 2 are generally higher, which we attribute to pixels along the outer edges of lakes being more accurately classified as water.

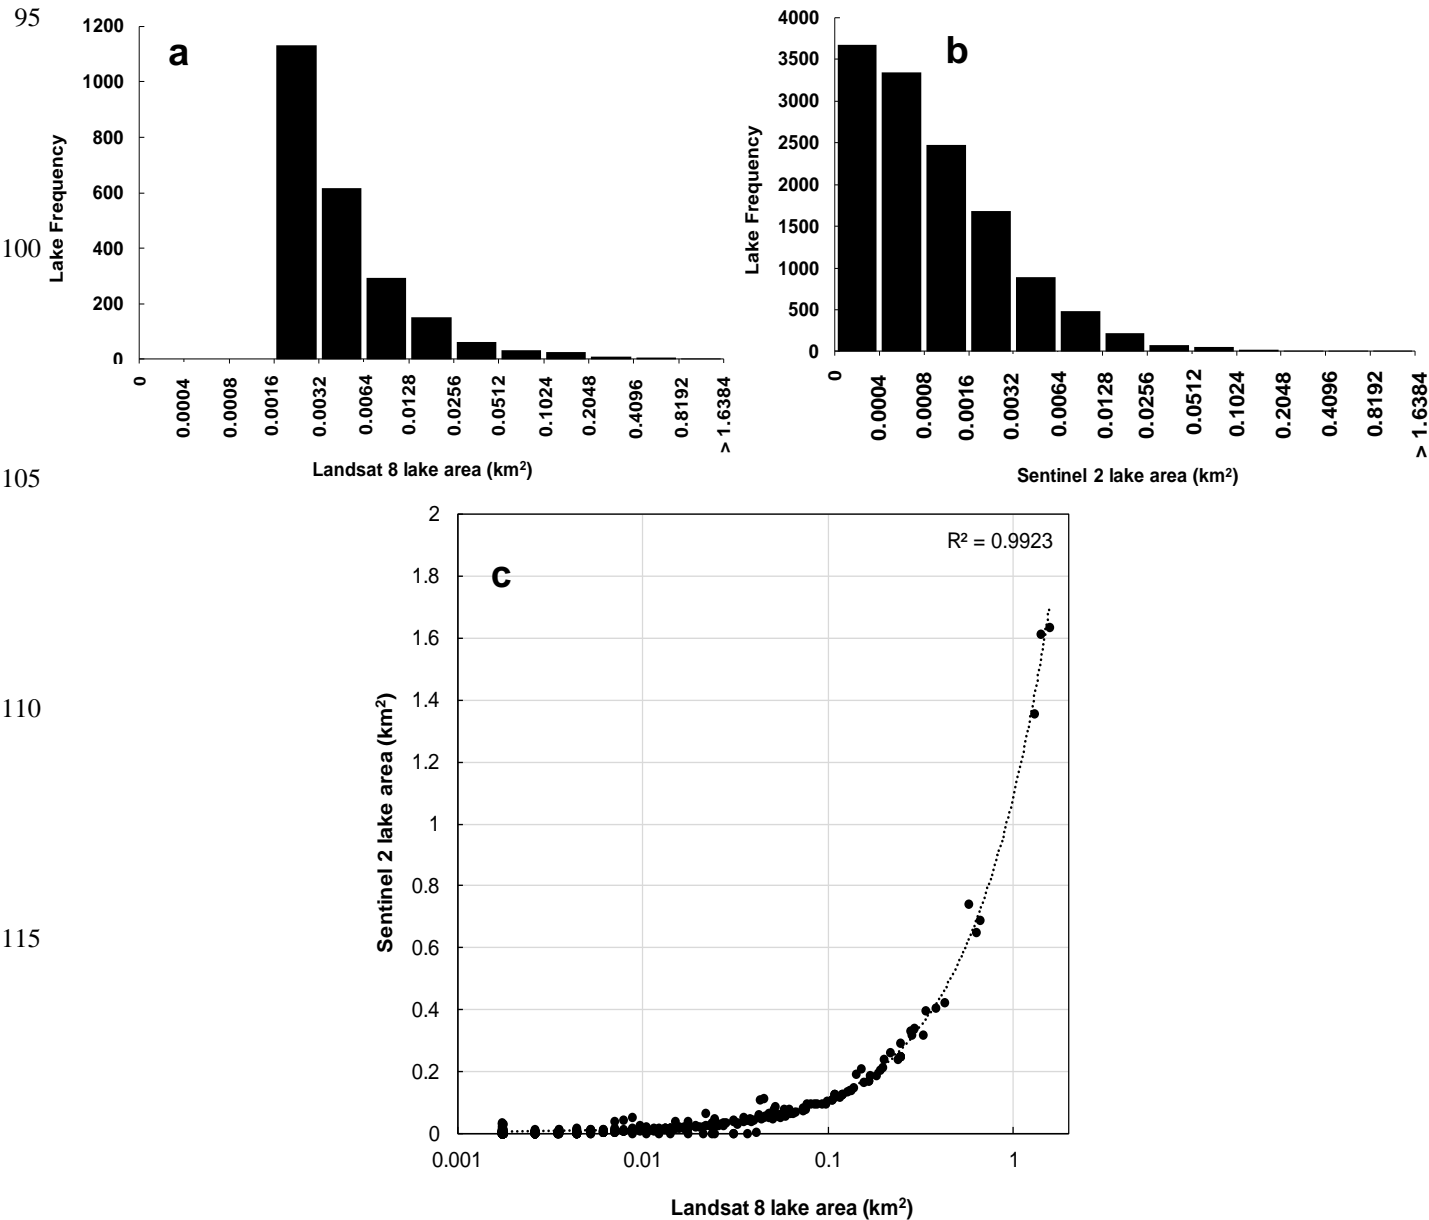

Supplementary Figure 3. Lake area-frequency distribution from a Landsat 8 scene on 11<sup>th</sup> January 2020 (a). Lake area-frequency distribution from the overlapping portion of a Sentinel 2 scene on 11<sup>th</sup> January 2020 (b). Scatterplot of Landsat 8 versus Sentinel 2 lake areas (c).

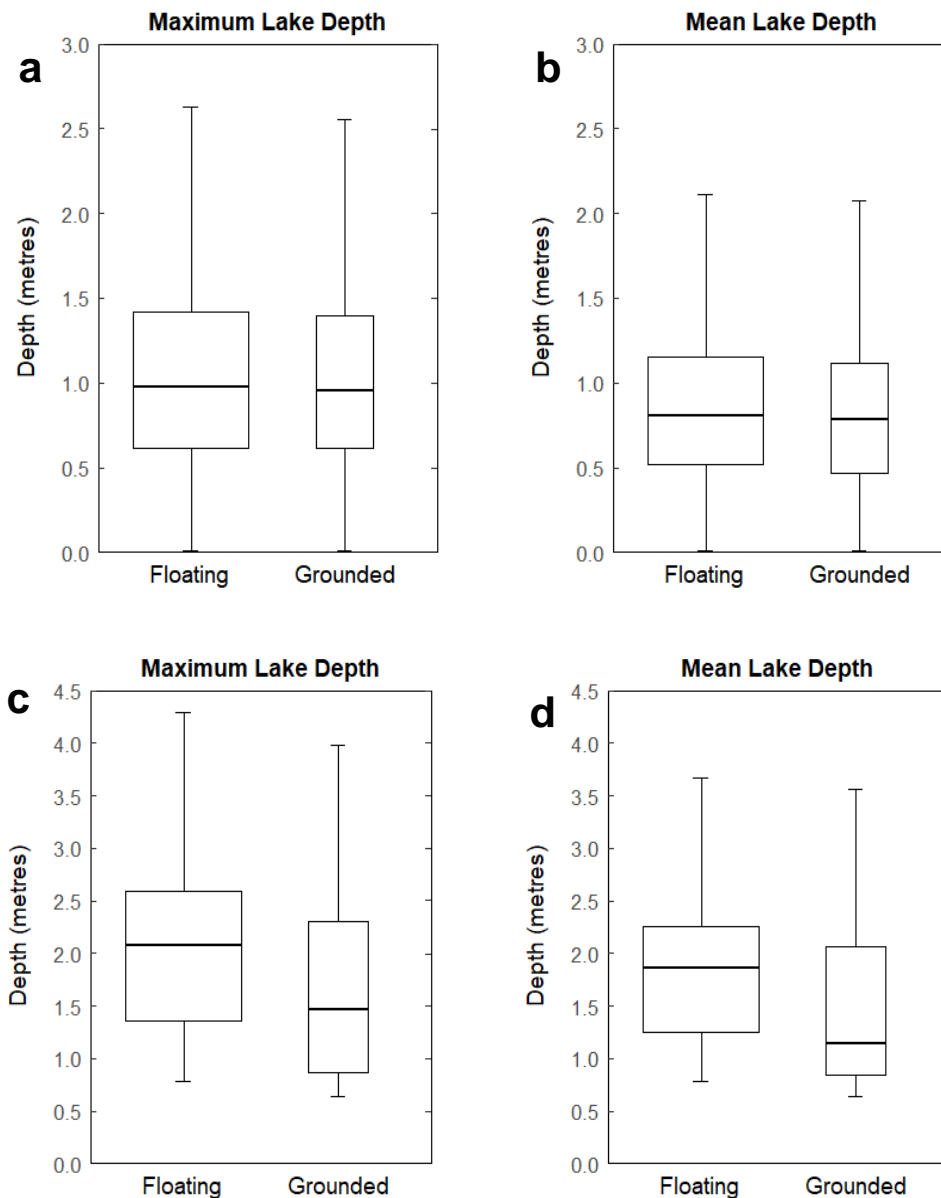

Supplementary Figure 4. Box plots of maximum depth and mean depth of SGLs on Shackleton Ice Shelf and on grounded ice within the sub-region (Figure 1, green box) from 2000 to 2020 (a, b) and from the date when the deepest lakes formed, 03/01/2014 (c, d). On each box, the bold line marks the median and the edges of the box are the 25<sup>th</sup> and 75<sup>th</sup> percentiles (q1 and q3). The length of the upper and lower whiskers is  $q3 + 1.5 * (q3 - q1)$  and  $q1 - 1.5 * (q3 - q1)$  respectively. Box widths are proportional to the number of lakes recorded on floating and grounded ice.



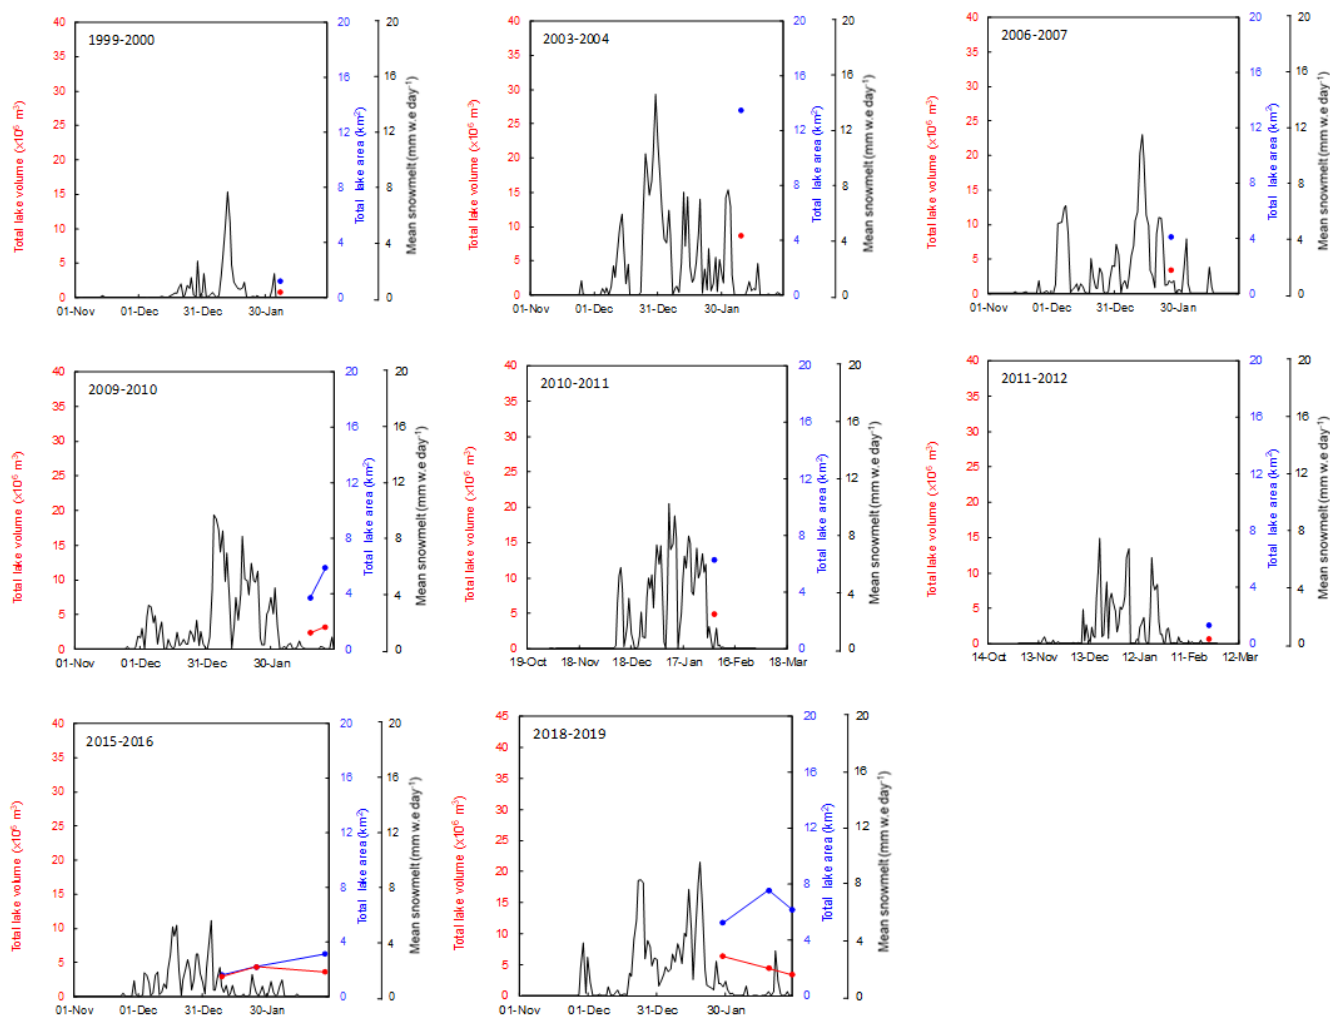

**Supplementary Figure 5. Seasonal variations in total lake area, volume and modelled snowmelt for melt seasons with insufficient imagery to be able to determine whether peak area and volume follow a spike in surface melt. Snowmelt rates are mean values over the entire ice shelf.**

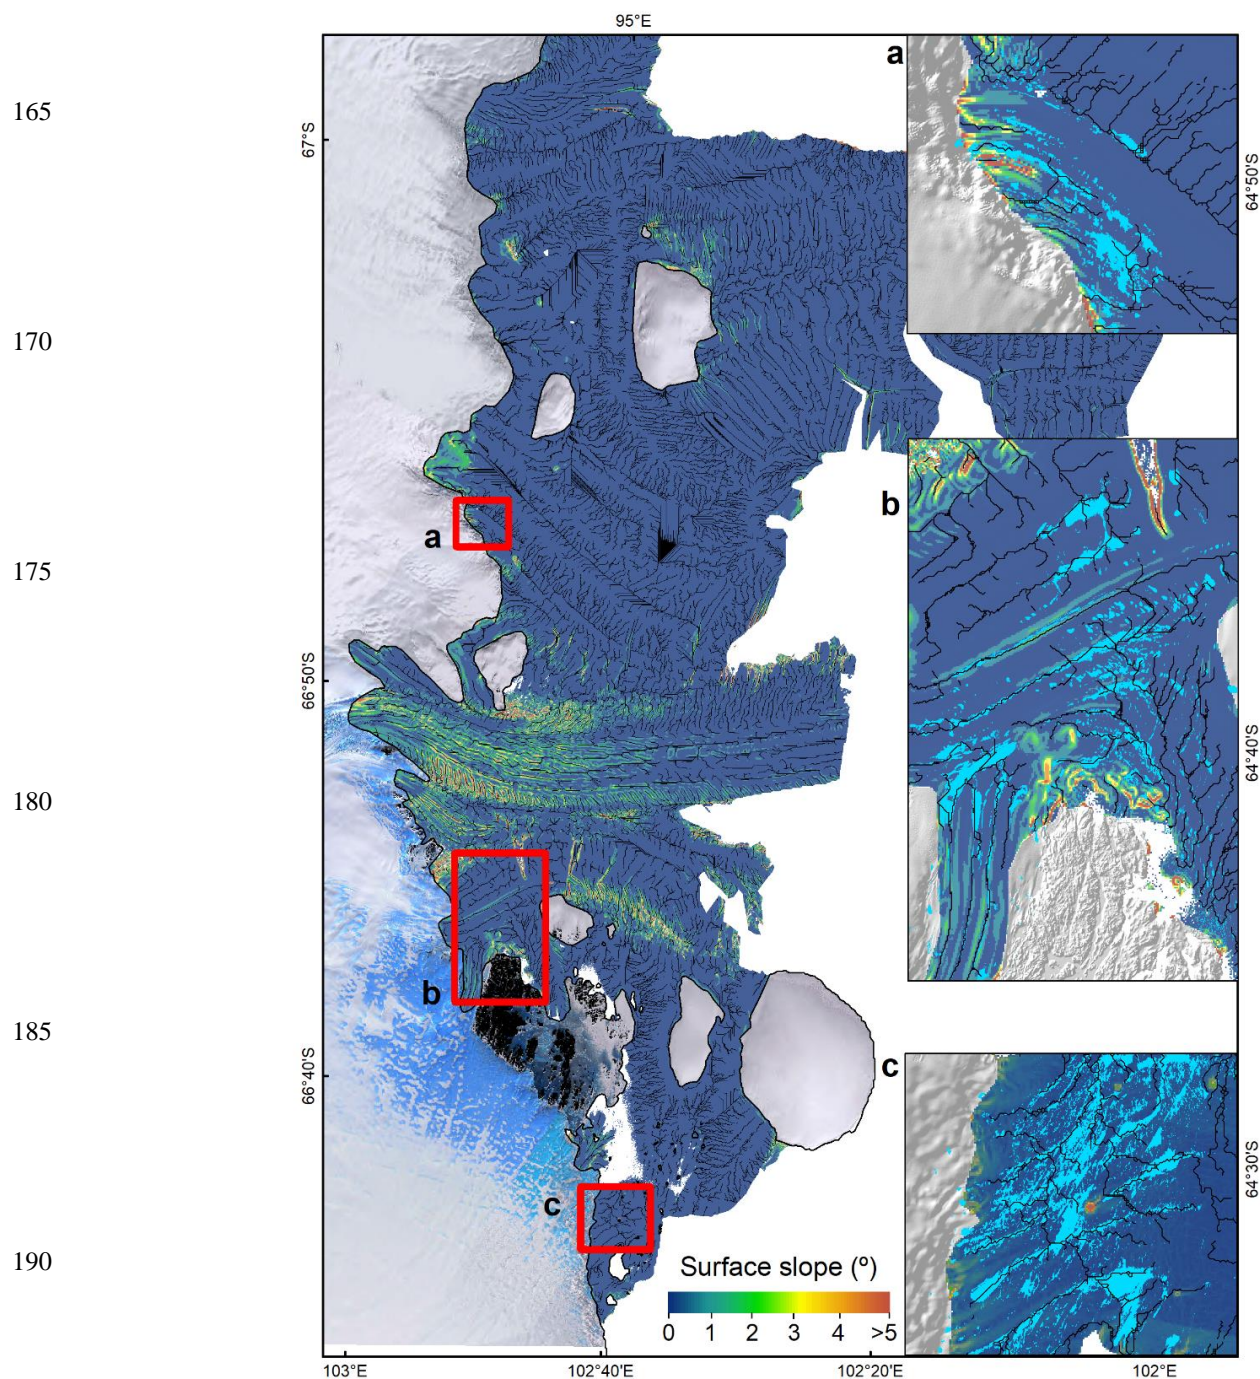

Supplementary Figure 6. Predicted surface meltwater routing on Shackleton Ice Shelf (black channels) overlain by ice shelf surface slopes and by SGs mapped in this study (light blue), assuming widespread firn saturation across the ice shelf. Surface meltwater is predicted to be fed from higher slope areas upstream and converge in topographical lows, where it will be exported off the ice shelf along troughs. Insets show SGs mapped in this study closely correspond with predicted paths of meltwater routing.
